# Supplementary material
Source: PubMed Central journal article supplement (PMC5027142)
Supplement: NIHMS767511-supplement-Figure_S2.pdf [file NIHMS767511-supplement-Figure_S2.pdf]

**A** SELEX (Blanchett et al)

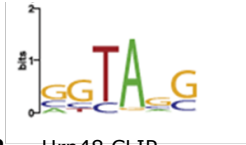

**C** Hrp48-ADARcd CLIP

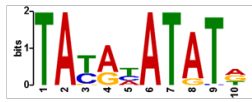

**B** Hrp48 CLIP

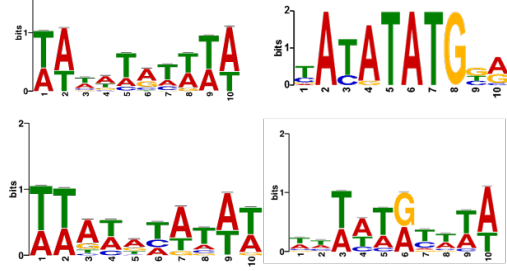

**D** Hrp48-TRIBE +/- 20 bp

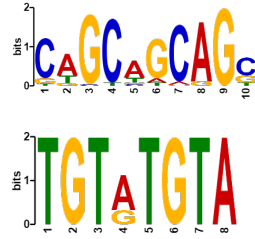

1 E-value: 4.1e-014 Site Count: 44  
 2 E-value: 7.0e-009 Site Count: 38

**E** Hrp48-TRIBE +/- 100 bp

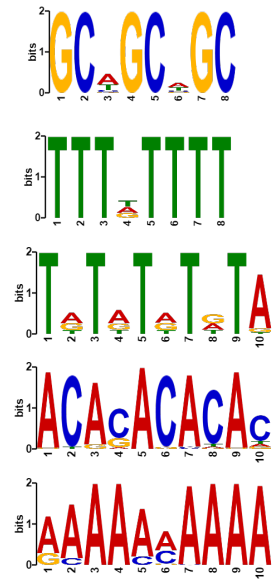

1 E-value: 7.0e-069 Site Count: 169  
 2 E-value: 1.3e-029 Site Count: 242  
 3 E-value: 1.7e-026 Site Count: 382  
 4 E-value: 2.0e-020 Site Count: 71  
 5 E-value: 1.2e-028 Site Count: 150

**B**

1 E-value: 2.9e-049 Site Count: 182  
 2 E-value: 3.3e-041 Site Count: 165

**C**

1 E-value: 3.8e-002 Site Count: 62  
 2 E-value: 4.6e-002 Site Count: 49  
 3 E-value: 3.0e-003 Site Count: 84
