# Supplementary material
Source: PubMed Central journal article supplement (PMC5027142)

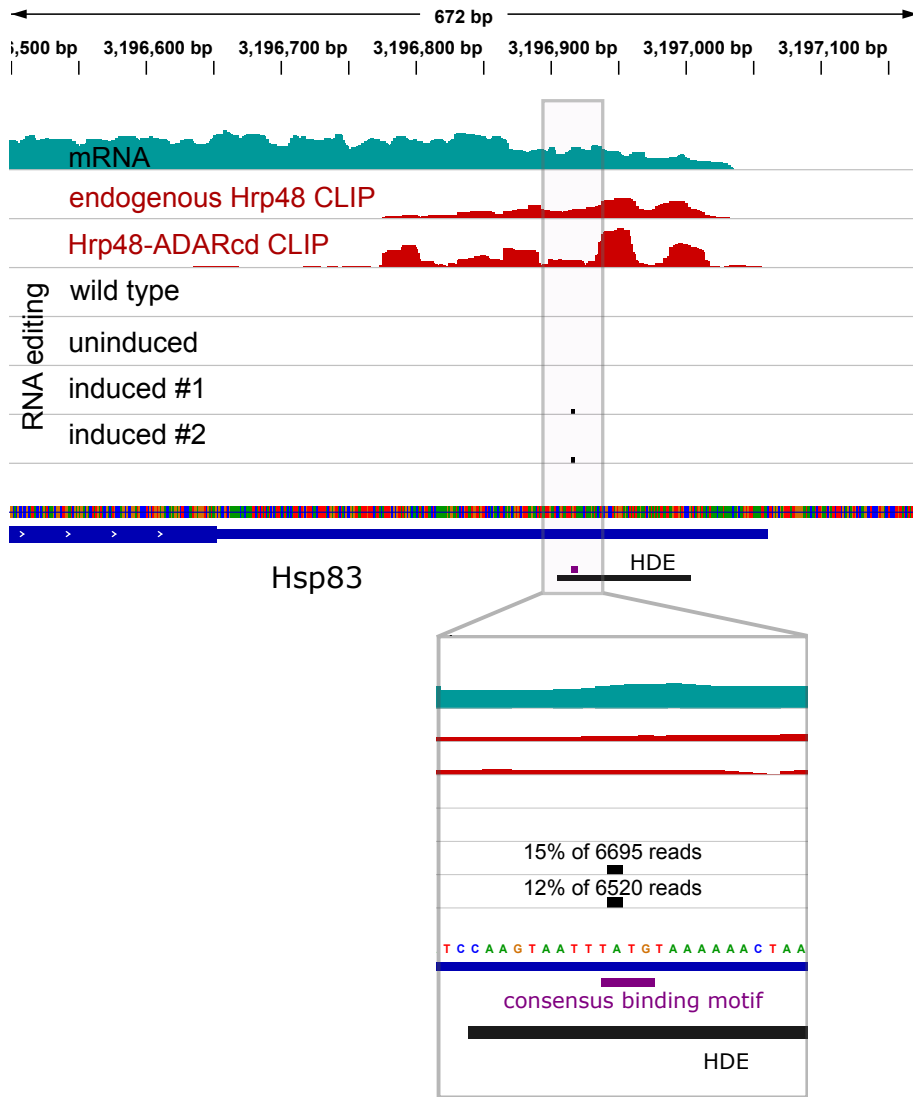

Supplement: NIHMS767511-supplement-Figure_S1.pdf [file NIHMS767511-supplement-Figure_S1.pdf]

A

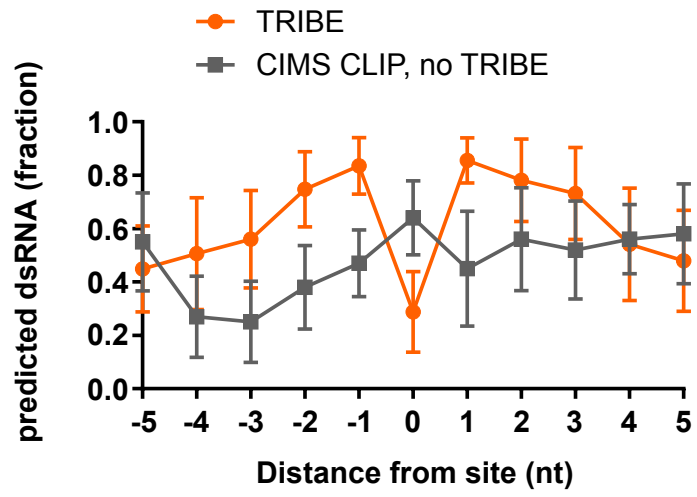

B

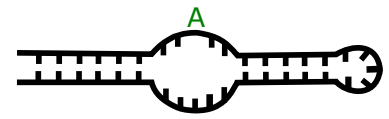

Supplement: NIHMS767511-supplement-Figure_S3.pdf [file NIHMS767511-supplement-Figure_S3.pdf]

A

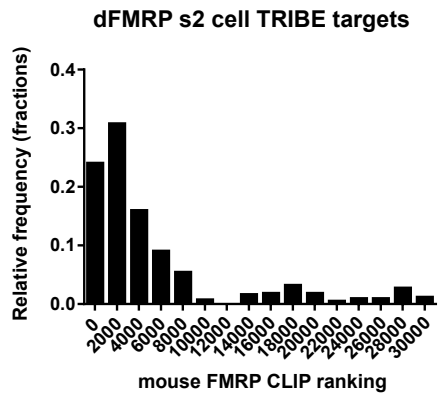

B

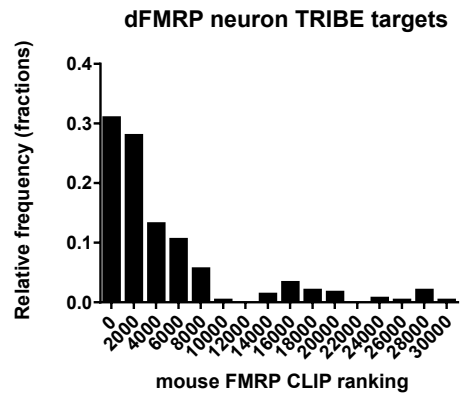

C

**Fly homologs of mouse brain FMRP CLIP targets**

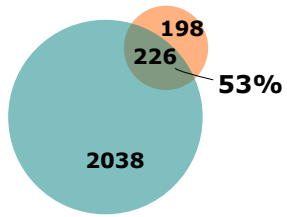

**dFMR1 neuron (Cha)  
TRIBE targets**

Supplement: NIHMS767511-supplement-Figure_S4.pdf [file NIHMS767511-supplement-Figure_S4.pdf]

A

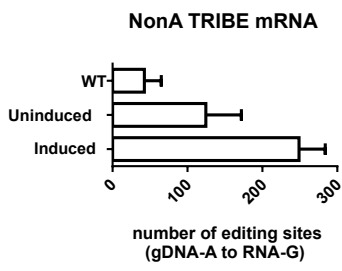

B

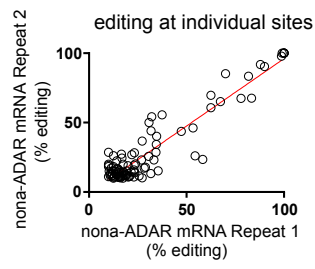

C

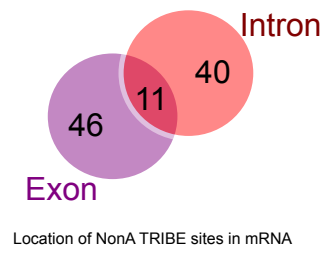

D

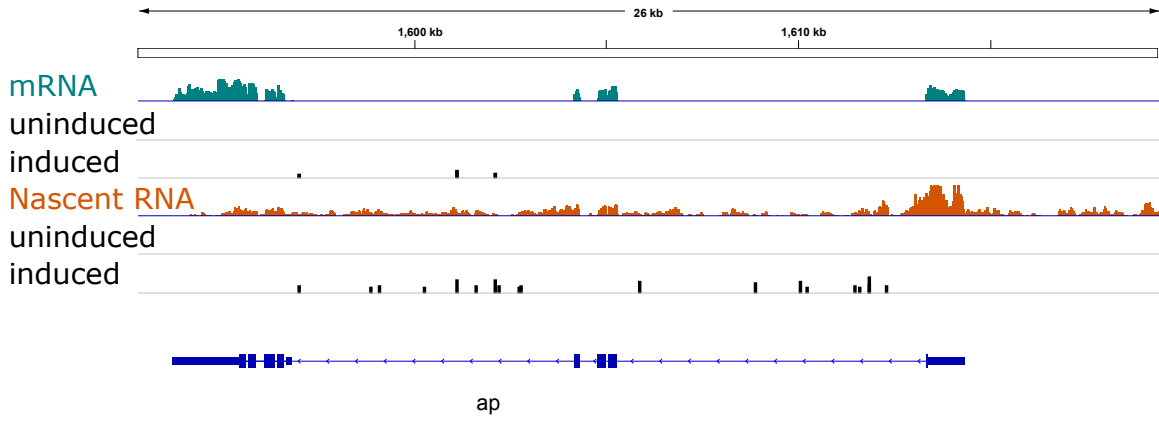

Supplement: NIHMS767511-supplement-Figure_S6.pdf [file NIHMS767511-supplement-Figure_S6.pdf]

A

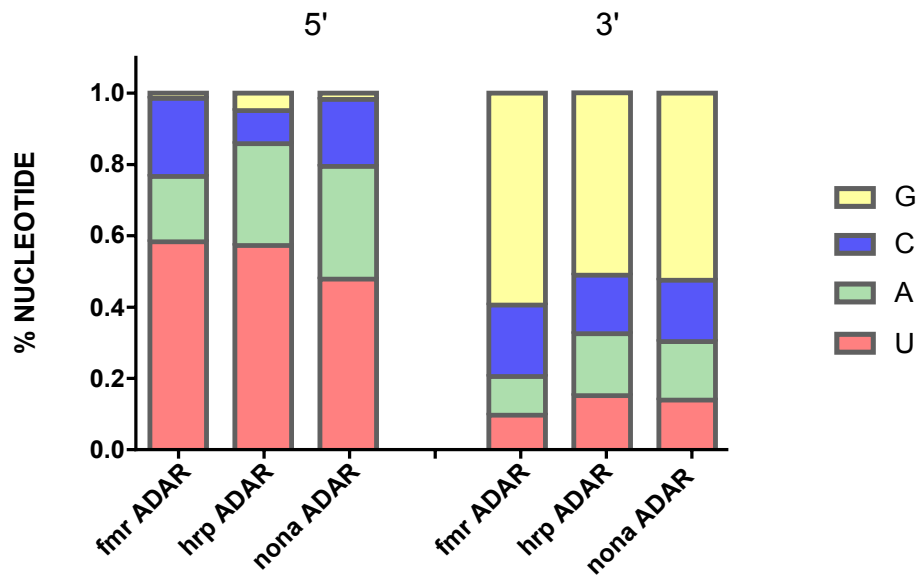

B

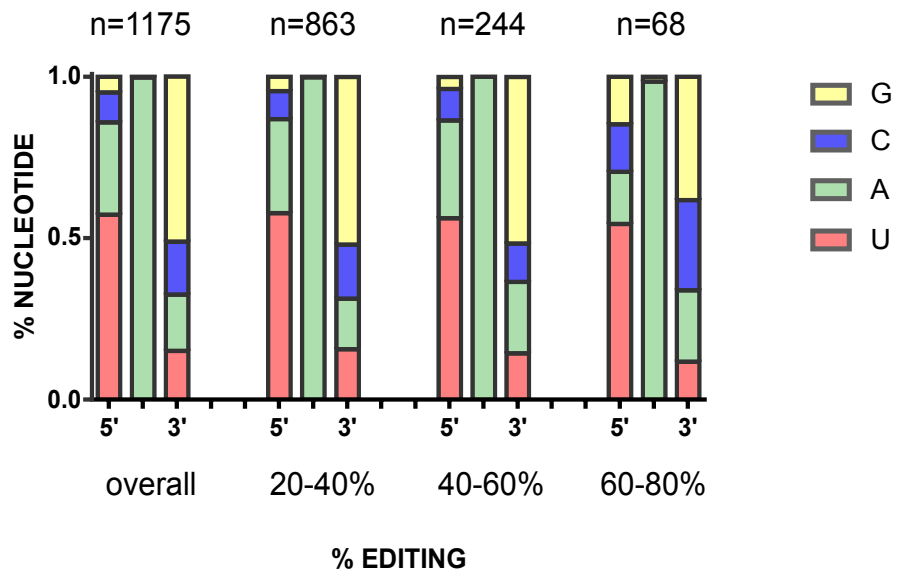

Supplement: NIHMS767511-supplement-Figure_S7.pdf [file NIHMS767511-supplement-Figure_S7.pdf]
